# Supplementary material
Source: publisher figshare collection journal article supplement (https://acs.figshare.com/ndownloader/files/14342609)
Supplement: Supplementary file 1 [file 14342609]

# **PCF-Graphene: A 2D $sp^2$ Hybridized Carbon Allotrope with a Direct Band Gap**

*Yiheng Shen,<sup>†,‡</sup> Jiabing Yu,<sup>‡</sup> Junyi Liu,<sup>‡</sup> Yaguang Guo,<sup>†,‡</sup> Yu Qie<sup>‡</sup> and Qian Wang<sup>\*,†,‡</sup>*

<sup>†</sup> Center for Applied Physics and Technology, HEDPS, College of Engineering,  
Peking University, Beijing 100871, China

<sup>‡</sup> Department of Materials Science and Engineering, BKL-MEMD, College of  
Engineering, Peking University, Beijing 100871, China

## **SUPPORTING INFORMATION**

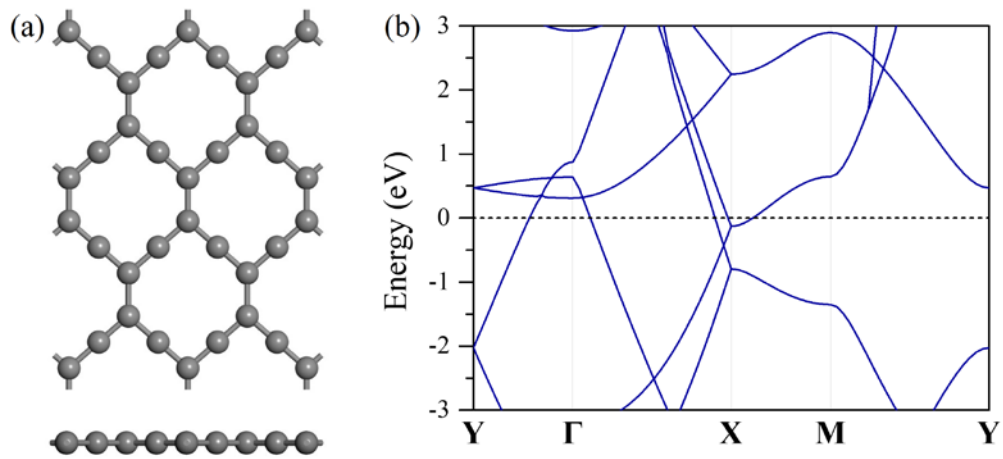

**Figure S1.** (a) Top and side views of the atomic configuration, and (b) electronic band structure of the planar structure originating from the exfoliated PCF-graphene.

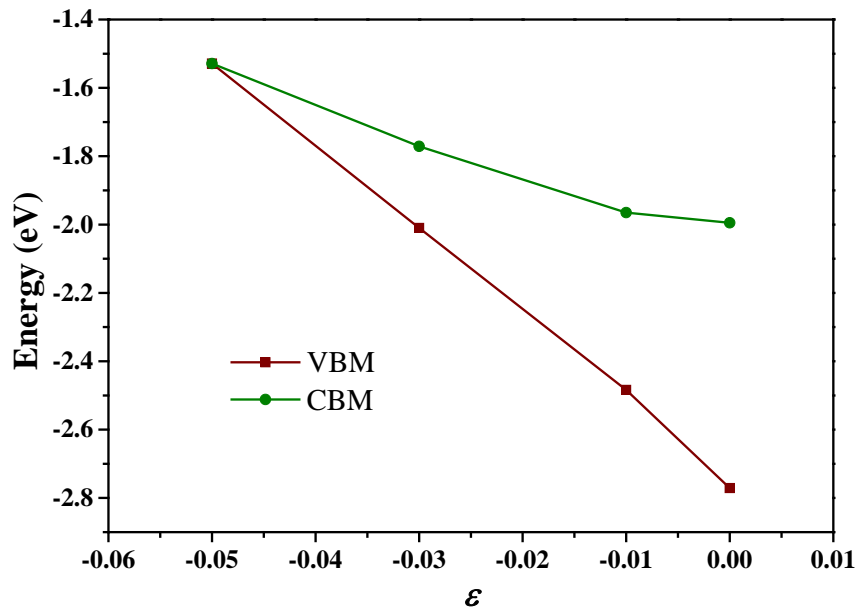

**Figure S2.** Energy of the VBM and CBM of PCF-graphene as a function of biaxial strain  $\epsilon$ . The band gap is closed under a 5%-biaxial strain.

**POSCAR file** of optimized PCF-graphene.

|              |              |              |               |
|--------------|--------------|--------------|---------------|
| PCF-graphene |              |              |               |
| 1.0          |              |              |               |
|              | 4.9148001671 | 0.0000000000 | 0.0000000000  |
|              | 0.0000000000 | 5.4871001244 | 0.0000000000  |
|              | 0.0000000000 | 0.0000000000 | 25.0289001465 |
| C            |              |              |               |
| 16           |              |              |               |
| Direct       |              |              |               |
|              | 0.2500000000 | 0.2500000000 | 0.472689986   |
|              | 0.7500000000 | 0.7500000000 | 0.527310014   |
|              | 0.7500000000 | 0.7500000000 | 0.472689986   |
|              | 0.2500000000 | 0.2500000000 | 0.527310014   |
|              | 0.7500000000 | 0.2500000000 | 0.527310014   |
|              | 0.2500000000 | 0.7500000000 | 0.472689986   |
|              | 0.2500000000 | 0.7500000000 | 0.527310014   |
|              | 0.7500000000 | 0.2500000000 | 0.472689986   |
|              | 0.5000000000 | 0.374410003  | 0.451110005   |
|              | 0.5000000000 | 0.625589967  | 0.548889995   |
|              | 0.5000000000 | 0.625589967  | 0.451110005   |
|              | 0.5000000000 | 0.374410003  | 0.548889995   |
|              | 0.0000000000 | 0.874410033  | 0.451110005   |
|              | 0.0000000000 | 0.125589997  | 0.548889995   |
|              | 0.0000000000 | 0.125589997  | 0.451110005   |
|              | 0.0000000000 | 0.874410033  | 0.548889995   |
